1 **LncRNA GAS5 attenuates fibroblast activation through inhibiting Smad3 signaling**

2  
3 Rui Tang<sup>2+#</sup>, Yung-Chun Wang<sup>1+</sup>, Xiaohan Mei<sup>1,2+</sup>, Ning Shi<sup>1</sup>, Chengming Sun<sup>2</sup>, Ran Ran<sup>2</sup>,  
4 Gui Zhang<sup>2</sup>, Wenjing Li<sup>2</sup>, and Kevin F. Staveley-O'Carroll<sup>1,4</sup>, Guangfu Li<sup>1</sup>, Shi-You  
5 Chen<sup>1,2,3\*</sup>  
6

7 <sup>1</sup>Department of Surgery, University of Missouri School of Medicine, Columbia, MO 65212;

8 <sup>2</sup>Department of Physiology & Pharmacology, University of Georgia, Athens, GA, 30602;

9 <sup>3</sup>Department of Medical Pharmacology & Physiology, University of Missouri School of  
10 Medicine, Columbia, MO 65212

11 <sup>4</sup> The Research Service, Harry S. Truman Memorial Veterans Hospital, Columbia, MO 65212  
12

13 **Running title:** GAS5 in fibroblast activation.

14  
15 <sup>+</sup>These authors contribute equally to this paper.

16  
17 <sup>#</sup>Current address: Department of Genetics, Stanford University School of Medicine, Stanford,  
18 CA 94305  
19

20 <sup>\*</sup>To whom correspondence should be addressed: Department of Sugery, University of Missouri  
21 School of Medicine, 1 Hospital Drive, Columbia, MO 65212, Tel: (573) 884-0371; Fax: (573)  
22 884-4585; Email: [scqvd@missouri.edu](mailto:scqvd@missouri.edu)  
23

24 **Keywords:** LncRNA, GAS5, TGF- $\beta$ , fibroblast activation, skin fibrosis  
25  
26

27 **Abbreviations:**

28

|                  |                                           |
|------------------|-------------------------------------------|
| 29 TGF- $\beta$  | Transforming Growth Factor $\beta$        |
| 30 lncRNA        | Long noncoding RNA                        |
| 31 GAS5          | Growth arrest-specific transcript 5       |
| 32 ECM           | Extracellular matrix                      |
| 33 Col1A         | Collagen 1A                               |
| 34 T $\beta$ R   | TGF- $\beta$ receptor                     |
| 35 JNK           | c-Jun N-terminal kinase                   |
| 36 FISH          | Fluorescence in situ hybridization        |
| 37 RIP           | RNA immunoprecipitation                   |
| 38 Co-IP         | Co-immunoprecipitation                    |
| 39 Smad3         | Mothers against decapentaplegic homolog 3 |
| 40 PPM1A         | Protein phosphatase 1A                    |
| 41 $\alpha$ -SMA | Smooth muscle $\alpha$ -actin             |
| 42 IHC           | Immunohistochemistry                      |
| 43 RNP           | RNA-Protein complex                       |

44  
45  
46

47 **Abstract:**

48

49 Transforming Growth Factor  $\beta$  (TGF- $\beta$ )-induced fibroblast activation is a key pathological  
50 event during tissue fibrosis. Long noncoding RNA (lncRNA) is a class of versatile gene  
51 regulators participating in various cellular and molecular processes. However, the function of  
52 lncRNA in fibroblast activation is still poorly understood. In this study, we identified growth  
53 arrest-specific transcript 5 (GAS5) as a novel regulator for TGF- $\beta$ -induced fibroblast activation.  
54 GAS5 expression was downregulated in cultured fibroblasts by TGF- $\beta$  and in resident  
55 fibroblasts from bleomycin-treated skin tissues. Overexpression of GAS5 suppressed TGF- $\beta$ -  
56 induced fibroblast to myofibroblast differentiation. Mechanistically, GAS5 directly bound  
57 Smad3 and promoted Smad3 binding to PPM1A, a Smad3 dephosphatase, and thus accelerated  
58 Smad3 dephosphorylation in TGF- $\beta$ -treated fibroblasts. In addition, GAS5 inhibited fibroblast  
59 proliferation. Importantly, local delivery of GAS5 via adenoviral vector suppressed bleomycin-  
60 induced skin fibrosis in mice. Collectively, our data revealed that GAS5 suppresses fibroblast  
61 activation and fibrogenesis through inhibiting TGF- $\beta$ /Smad3 signaling, which provides a  
62 rationale for an lncRNA-based therapy to treat fibrotic diseases.

63

64

65

66

67

68

## 69 **Introduction**

70

71 Tissue fibrosis is a wound healing progress following injury, during which normal  
72 parenchymal tissue is gradually replaced by connective tissue, accompanied by deposition of  
73 extracellular matrix (ECM) components (7, 51, 53). The pathogenesis of fibrosis is initiated in  
74 the residential area where local injury triggers innate immune response and causes recruitment  
75 of immune cells (26, 32, 40). Pro-fibrotic cytokines or growth factors such as transforming  
76 growth factor  $\beta$  (TGF- $\beta$ ) secreted from circulating monocytes and residential macrophages  
77 induce fibroblast activation through fibroblast-myofibroblast transition (6, 22, 37, 38).  
78 Activated fibroblasts proliferate and thus increase tissue mass. Meanwhile, myofibroblasts  
79 express extracellular matrix proteins such as collagen 1A (Col1A), the main component of  
80 excessive ECM deposition in human fibrotic diseases such as skin, cardiovascular, pulmonary,  
81 and liver fibrosis. (57, 58).

82

83 TGF- $\beta$  signaling regulates a wide spectrum of cellular processes, including cell differentiation,  
84 proliferation, migration, and apoptosis (33, 35). TGF- $\beta$  induces fibrosis through inducing  
85 fibroblast trans-differentiation into collagen-producing myofibroblasts and increasing  
86 fibroblast proliferation (5, 29). TGF- $\beta$  transduces its signal mainly through Smad-dependent  
87 pathways. TGF- $\beta$  binds and activates TGF- $\beta$  receptors (T $\beta$ R), leading to Smad  
88 phosphorylation and translocation into nuclei where it activates the transcription of target genes  
89 (14). However, how Smad signaling is precisely modulated during TGF- $\beta$ -induced fibroblast  
90 activation and how TGF- $\beta$  coordinates fibroblast transdifferentiation and proliferation during  
91 fibrogenesis are not completely understood.

92

93 Long non-coding RNAs (lncRNAs) are a class of versatile regulators which regulate gene  
94 expression at various levels ranging from chromatin modulation to protein degradation (25).  
95 Growth Arrest Specific 5 (GAS5) is a well-known lncRNA that suppresses cell proliferation  
96 and induces apoptosis (27, 36). Our previous studies have identified GAS5 as a regulator in  
97 both Smad3-dependent cell differentiation and p53-dependent cell survival (47, 49). Since  
98 TGF- $\beta$  signaling regulates both Smad-dependent fibroblast-myofibroblast transition and  
99 fibroblast proliferation, we hypothesized that GAS5 may be involved in TGF- $\beta$ -induced  
100 fibroblast activation and fibrogenesis.

101

102 In the current study, we firstly observed that GAS5 was downregulated in TGF- $\beta$ -treated  
103 fibroblast cells and bleomycin-injected skin tissues. By both gain-of- and loss-of-function  
104 studies, we found that GAS5 suppressed TGF- $\beta$ -induced fibroblast-myofibroblast transition  
105 through modulating Smad3 signaling. Mechanistically, GAS5 directly bound to Smad3, which  
106 enhanced phosphatase PPM1A binding to Smad3, and thus accelerated Smad3  
107 dephosphorylation. GAS5 also inhibited fibroblast proliferation by blocking c-Jun N-terminal  
108 kinase (JNK) signaling pathway. In vivo, local delivery of adenoviral vector expressing GAS5  
109 inhibited bleomycin-induced skin fibrosis in mice.

110

## 111 **Material and Methods:**

112

113 **Cells and Reagents:** NIH-3T3 cells were purchased from American Type Culture Collection  
114 (ATCC). Cells were maintained at 37 °C in a humidified 5% CO<sub>2</sub> incubator in Dulbecco's  
115 Modified Eagle's Medium (GIBCO, CA, USA) containing 10% fetal bovine serum (GIBCO,  
116 CA, USA), 100 units/ml penicillin and 100  $\mu$ g/ml streptomycin. TGF- $\beta$ 1 was obtained from  
117 R&D Systems (Minneapolis, MN). mGAS5 siRNA (n251731) was purchased from Life  
118 Technologies (Gaithersburg, MD). Smad3 inhibitor SIS3 was purchased from Sigma-Aldrich

119 (St. Louis, MO, USA). PPM1A (PA5–29275) antibody was purchased from ThermoFisher  
120 Scientific (Pittsburgh, PA)(15). Akt (4691S), phospho-Akt (9271S), JNK (9252S), phospho-  
121 JNK (9251S), p38 (9212S), phospho-p38 (4511S), Smad3 (9523S), phospho-Smad3 (9520S),  
122 and Smad4 (38454) antibodies were purchased from Cell Signaling (Danvers, MA, USA)(48,  
123 49). GAPDH (G8795) and  $\alpha$ -SMA (A2547)antibodies were purchased from Sigma-Aldrich (St.  
124 Louis, MO, USA)(43). PCNA (sc-56) and Type I Collagen (Col1A) (sc-25974) antibodies were  
125 purchased from Santa Cruz Biotechnology (Dallas, TX, USA) (43, 47). Smad3 overexpression  
126 plasmid was constructed by subcloning human Smad3 cDNA into pcDNA3.0 backbone  
127 plasmid (Addgene). GAS5 adenoviral vector was constructed by inserting mouse GAS5 cDNA  
128 into pShuttle-IRES-hrGFP-1 vector (Agilent), and adenovirus was packaged as described  
129 previously (49). All constructs were confirmed by Sanger sequencing.

130

131 **Primary mouse skin fibroblast preparation:** Skin tissues of C57BL/6J mice (The Jackson  
132 Laboratory) were dissected, cut into small pieces, and digested in 5 ml tissue digest media (3.5  
133 ml HBSS-Ca<sup>2+</sup> free, 0.5 mL Trypsin-EDTA (0.25%), 5 mg Collagenase IV (Worthington), 25  
134 U Dispase (Corning)) in a hybridization chamber with rotation at 37°C for 30 minutes.  
135 Digestion was then neutralized by adding 5 ml ice-cold Quench Solution (4.5 ml L15 media,  
136 0.5 mL FBS, 94  $\mu$ g DNase). Single cell suspensions were generated by filtering through a 40  
137  $\mu$ M cell strainer, spinning down at 500 rcf for 5 minutes followed by washing with PBS twice.  
138 Skin fibroblasts were resuspended and cultured in Dulbecco’s Modified Eagle’s Medium  
139 (GIBCO, CA, USA) containing 10% fetal bovine serum (GIBCO, CA, USA), 100 units/ml  
140 penicillin and 100  $\mu$ g/ml streptomycin.

141

142 **Animals and skin fibrosis model:** All animals were housed under conventional conditions in  
143 the animal care facility and received humane care in compliance with the Principles of  
144 Laboratory Animal Care formulated by the National Society for Medical Research and the  
145 Guide for the Care and Use of Laboratory Animals. Bleomycin-induced dermal  
146 sclerosis/fibrosis was generated following previously published protocol (43). 8-10 week old  
147 male C57BL/6 mice were injected subcutaneously with bleomycin (0.02U) in PBS every other  
148 day for 14 or 28 days. PBS was injected as control. Adenovirus ( $1 \times 10^8$  pfu per mouse)  
149 expressing GFP or mGAS5 was injected twice on the first day and 14 days following the first  
150 bleomycin injection. After 2 or 4 weeks, the animals were euthanized by CO<sub>2</sub> asphyxiation  
151 and cervix dislocation. The skin areas with bleomycin injection were removed and processed  
152 for biochemical or histological analysis. All animal surgical procedures were approved by the  
153 Institutional Animal Care and Use Committee of the University of Georgia.

154

155 **Quantitative RT-qPCR (qPCR):** Total RNA was extracted from cells or tissues using Trizol  
156 reagent (Life Technologies, Gaithersburg, MD) and reverse-transcribed to cDNA using  
157 iScript™ cDNA Synthesis Kit (Bio-Rad, Hercules, CA). qPCR was performed using a  
158 Stratagene Mx3005 qPCR thermocycler (Agilent Technologies, La Jolla, CA). All reactions  
159 including no template controls were run in triplicates. After the reaction, the CT values were  
160 determined using fixed threshold settings. LncRNA expression was normalized to Cyclophilin  
161 (CYP). Primers used in this study were listed in Supplementary Table 1.

162

163 **RNA immunoprecipitation (RIP) assay:** RIP assay was performed as described (49). Cells  
164 at 80-90% confluence in 15 cm<sup>2</sup> culture dishes were fixed with 1% Paraformaldehyde (PFA)  
165 and lysed in FA lysis buffer (50 mM HEPES, 140 mM NaCl, 1 mM EDTA, 1% (v/v) Triton  
166 X-100, 0.1% (w/v) sodium deoxycholate, pH7.5) containing 40U/ml RNase inhibitor (Sigma-  
167 Aldrich, St. Louis, MO) and 1X Halt™ Protease Inhibitor Cocktail (Thermofisher Scientific,  
168 Grand Island, NY). After 4-6 rounds of 50% power output sonication, 300  $\mu$ l of whole cell

169 extracts (around 500  $\mu$ g total proteins) were incubated with normal rabbit IgG, Smad3, Smad4,  
170 or PPM1A antibodies (1  $\mu$ g) at 4°C overnight. Next day, the immune complexes were captured  
171 with 50  $\mu$ l protein A/G agarose beads (Santa Cruz Biotechnology, Dallas, TX, USA). After  
172 washing with FA lysis buffer, samples were incubated with Proteinase K at 42°C for 1 hour to  
173 digest the protein and then immunoprecipitated RNA was isolated. Purified RNA was  
174 subjected to qRT-PCR analysis for detecting the presence of GAS5.

175

176 **Western blot:** Cultured cells or tissue samples were lysed in RIPA buffer (50 mM Tris-HCl,  
177 pH 7.4; 150 mM NaCl; 1% NP-40; and 0.1% SDS), and incubated with continuous rotation for  
178 10 min at 4 °C, and then centrifuged at 12 000  $\times$ g. The supernatant was collected, and the  
179 protein concentration was determined by a BCA assay (Pierce, Rockford, USA). Protein  
180 extracts (60-100  $\mu$ g) were dissolved on 10% sodium dodecyl sulfate-polyacrylamide gels  
181 (SDS-PAGE) and transferred to polyvinylidene difluoride (PVDF) membranes. The  
182 membranes were blocked with 5% non-fat milk in Tris-buffered saline (TBS) plus Tween-20  
183 (TBST) at room temperature for 1 h followed by incubation with primary antibodies diluted in  
184 TBST at 4 °C overnight. After three 10-min washing with TBST, blots were incubated with  
185 the appropriate secondary antibody conjugated to HRP at room temperature for 1 h. The protein  
186 expression was detected with enhanced chemiluminescent reagent.

187

188 **Co-immunoprecipitation assay (Co-IP):** Cells were transduced with Ad-GFP or Ad-GAS5  
189 for 24 hours, and lysed with ice-cold lysis buffer containing protease inhibitor mix (Sigma).  
190 The lysates were incubated with IgG or anti-PPM1A antibody for 1 h followed by incubation  
191 with protein A/G-beads at 4 °C for 12 h. The immunoprecipitates were pelleted, washed, and  
192 subjected to immunoblotting.

193

194 **Chromatin immunoprecipitation (ChIP):** Fresh tissues were minced into small pieces in  
195 ice-cold PBS with a clean razor blade. Formaldehyde was then added to a final concentration  
196 of 1% and incubated with shaking at room temperature for 10 min. The cross-linked tissues  
197 were collected by centrifugation at 4°C and washed with PBS containing protease inhibitors  
198 before final collection. The tissues were resuspended by rotating in 1% SDS lysis buffer at  
199 4°C for 20 min followed by sonication on ice to shear DNA into 500-1000 bp fragments. The  
200 lysates were immunoprecipitated with 2  $\mu$ g of IgG (negative control) or Smad3 antibody in  
201 coimmunoprecipitation reagents (17-195, Millipore). Semi-quantitative and quantitative PCR  
202 were performed to amplify  $\alpha$ -SMA or Col1A promoter regions containing SBE.

203

204 **Luciferase reporter assay:** 3T3 cells cultured in 12-well plates were transduced with AdGFP  
205 or AdGAS5 and transfected with 250 ng of firefly luciferase reporter plasmid driven by  $\alpha$ -SMA  
206 promoter using Lipofectamie LTX (Invitrogen, USA). Cells were treated with vehicle or 5  
207 ng/ml of TGF- $\beta$ 1 for 8 hours, and luciferase activities were measured using a luciferase assay  
208 kit (Promega) by following the manufacturer's protocol. The experiments were repeated for  
209 three times with triplicates.

210

211 **Immunohistochemistry (IHC) staining:** Tissue sections were rehydrated, permeabilized with  
212 0.01% Triton X-100 in PBS, blocked with 10% goat serum, and incubated with primary  
213 antibodies at 4°C overnight followed by incubation with horseradish peroxidase (HRP)-  
214 conjugated secondary antibody. The sections were counterstained with hematoxylin.

215

216 **MTT cell proliferation assay:** Cell proliferation was evaluated with 3-(4,5-dimethylthiazol-  
217 2-yl)-2, 5-diphenyltetrazolium (MTT) assay using a TACS MTT Cell Proliferation Assay Kit  
218 (Trivegen). The optical density at 570 nm was measured.



219

220 **Fluorescence in situ hybridization (FISH):** GAS5 RNA probes (sense/antisense) were  
221 synthesized and labeled using the FISH Tag RNA Multicolor kit (Life Technologies,  
222 Gaithersburg, MD). Skin tissue cryosections were digested with 20 µg/ml of proteinase K at  
223 37 °C for 1 hour, and washed with 2 × SSC solution and with water for 5 min each at room  
224 temperature. The slides were dehydrated, air-dried and incubated with pre-denatured GAS5  
225 probes in a dark and humid environment for hybridization at 55°C for 24 hours. The slides  
226 were then washed in 50% formamide in 2x SSC for 4 times before mounting. Nuclear was  
227 counterstained with 5,6-diamidino-2-phenylindole (DAPI).

228

229 **Statistical analysis:** Sample or experiment sizes were determined empirically to achieve  
230 sufficient statistical power. For animal studies, the sample size was chosen to minimize the  
231 number of sacrificed animals while obtaining sufficient statistical power. In all of the  
232 experiments reported in this study, no data point was excluded. No randomization was used in  
233 this study. There was no blinding method used to assign individuals to experimental groups.  
234 The variance is similar between groups that are being statistically compared.

235

236 All in vitro experiments is repeated at least three times in triplicates. At least five mice were  
237 used for each treatment group in bleomycin-induced skin fibrosis studies. All values are  
238 presented as means ± SEM. Comparisons of parameters between two groups were made by  
239 two-tailed Student's t-tests. The differences among several groups will be evaluated by one-  
240 way ANOVA with Tukey-Kramer post hoc evaluation. p-values <0.05 will be considered  
241 statistically significant. P values less than 0.05 and 0.01 were considered significant (\*) or  
242 very significant (\*\*), respectively.

243

## 244 **Results**

245

### 246 **GAS5 expression was decreased in TGF-β-activated fibroblasts.**

247 TGF-β activated fibroblasts as shown by the induction of myofibroblast marker α-SMA and  
248 Col1A in both 3T3 fibroblasts and primary cultured mouse skin fibroblasts (Fig. 1A-1D). To  
249 test if GAS5 is involved in the fibroblast activation, we first examined GAS5 expression in  
250 TGF-β-treated fibroblasts. 3T3 fibroblasts were treated with vehicle, 1, 2, 5, or 10 ng/ml TGF-  
251 β for 12 hours in serum-free DMEM. Total RNA was extracted, and GAS5 expression was  
252 detected by RT-qPCR. As shown in Fig. 1E, GAS5 was down-regulated in TGF-β-treated 3T3  
253 cells. Interestingly, 10 ng/ml of TGF-β slightly increased the GAS5 expression as compared to  
254 the treatment with 5 ng/ml of TGF-β (Fig 1E). This is probably because high concentration of  
255 TGF-β (≥10 ng/ml) can inhibit cell proliferation, which could re-activate GAS5 transcription  
256 as a feedback response. TGF-β-induced GAS5 reduction was also validated in primary cultured  
257 mouse skin fibroblasts (Fig. 1F). Since fibroblast activation is an essential process leading to  
258 tissue fibrosis, and bleomycin-induced skin fibrosis involves TGF-β signaling (13, 19, 43), we  
259 assessed if GAS5 expression is altered in bleomycin-treated skin tissues. C57BL/6 mice were  
260 injected subcutaneously with 0.02 U bleomycin every other day for 14 days, skin tissues were  
261 dissected, tissue RNA was extracted, and GAS5 expression was detected by qPCR. As shown  
262 in Fig. 1G, GAS5 was indeed downregulated in fibrotic skin tissues. Moreover, we observed  
263 GAS5-expressing cells by fluorescence in situ hybridization (FISH) assay. Comparing to the  
264 vehicle-treated skins, the numbers of GAS5-positive cells were significantly reduced in  
265 bleomycin-treated skin tissues (Fig. 1H-1I). These results suggested that GAS5 may be  
266 involved in TGF-β-induced fibroblast activation and skin fibrosis.

267

### 268 **GAS5 blocked TGF-β-induced fibroblast-myofibroblast transition.**

269 Since TGF- $\beta$  induces fibroblast activation through Smad-dependent pathway, and our previous  
270 studies have shown that GAS5 blocks TGF- $\beta$ /Smad3 signaling in SMC differentiation, we  
271 sought to determine if GAS5 affects TGF- $\beta$ -induced fibroblast to myofibroblast transition.  
272 Thus, we detected  $\alpha$ -SMA and Col1A protein expression in 3T3 cells transduced with AdGFP  
273 or AdGAS5 along with transfection with control or GAS5 siRNA. GAS5 overexpression and  
274 knockdown efficacies were detected by RT-qPCR (Supplemental Fig. S1). As shown in Fig.  
275 2A-2B, overexpression of GAS5 suppressed Col1A and  $\alpha$ SMA protein expression both at the  
276 basal state and under TGF- $\beta$  treatment. Conversely, knockdown of GAS5 by its siRNA  
277 increased TGF- $\beta$ -induced Col1A and  $\alpha$ -SMA expression (Fig. 2C-2D). Consistent with the  
278 protein expression, GAS5 negatively regulated Col1A and  $\alpha$ -SMA mRNA expression (Fig.  
279 2E-2F). Interestingly, GAS5 caused 5 times more reduction in Col1A and 7 times more  
280 reduction in  $\alpha$ -SMA expression in TGF- $\beta$ -treated cells than the vehicle-treated cells (Fig. 2E),  
281 suggesting that GAS5 regulates Col1A and  $\alpha$ -SMA expression primarily in association with  
282 TGF- $\beta$  signaling. Moreover, overexpression of GAS5 also suppressed TGF- $\beta$ -induced  $\alpha$ -SMA  
283 promoter activity (Fig. 2G). These results indicated that GAS5 inhibits TGF- $\beta$ -induced  
284 fibroblast activation by negatively regulating myofibroblast marker gene transcription.  
285

### 286 **GAS5 promoted Smad3 dephosphorylation.**

287 Previous studies have shown that TGF- $\beta$ /Smad3 signaling is continuously activated or  
288 phosphorylated during tissue fibrogenesis, which causes sustainable Smad nuclear retention  
289 (46). We have reported that Smad3 is phosphorylated and translocated into nuclei during the  
290 initial stage of TGF- $\beta$  stimulation while shuttling back to cytoplasm at the later stage of TGF-  
291  $\beta$ -induced smooth muscle differentiation (55). These observations prompted us to hypothesize  
292 that GAS5 may alter Smad phosphorylation status/nuclear retention in order to regulate TGF-  
293  $\beta$ -induced fibroblast activation. Since Smad nuclear localization depends on its  
294 phosphorylation status, we tested if GAS5 affects Smad2/3 phosphorylation/dephosphorylation  
295 turnover in 3T3 cells because Smad2/3 are the two major Smad proteins downstream of TGF-  
296  $\beta$  signaling. As shown in Fig. 3A-3B, TGF- $\beta$  induced both Smad2 and Smad3 phosphorylation.  
297 However, overexpression of GAS5 decreased Smad3, but not Smad2, phosphorylation. These  
298 data suggest that GAS5 regulates myofibroblast transition through promoting Smad3  
299 dephosphorylation in 3T3 cells.  
300

### 301 **GAS5 bound to Smad3 to increase Smad3 binding to PPM1A.**

302 Smad phosphorylation status in the nuclei is controlled by Smad phosphatase (8, 10, 15). To  
303 determine the mechanism by which GAS5 promotes Smad dephosphorylation, we first  
304 predicted the interactions between GAS5 and various known Smad phosphatases through  
305 IncPro (<http://bioinfo.bjmu.edu.cn/Incpro/>) (31). As shown in supplementary Table 2, PPM1A  
306 is the top candidate binding GAS5. Since GAS5 only binds Smad3, but not Smad2 (49), and  
307 GAS5 overexpression caused Smad3, but not Smad2, dephosphorylation (Fig 3A-3B), we  
308 sought to test how GAS5 affects Smad3 phosphorylation and hypothesized that GAS5 regulates  
309 Smad3 turnover through binding both Smad3 and PPM1A. Thus, we experimentally  
310 determined if GAS5 interacts with PPM1A and Smad3 by performing RNA  
311 immunoprecipitation (RIP) assays. RNA-protein complex from 3T3 cells were pulled down  
312 using anti-Smad3 or anti-PPM1A antibody with IgG used as a negative control. The presence  
313 of GAS5 in the complex was detected by RT-qPCR. As shown in Fig. 3C-3D, GAS5 directly  
314 bound to Smad3 (Fig. 3C) as well as PPM1A (Fig. 3D). To test if Smad3 interacts with PPM1A  
315 in 3T3 fibroblasts and determine if GAS5 affects Smad3-PPM1A interaction, co-  
316 immunoprecipitation (Co-IP) was performed using anti-PPM1A antibody and cell lysates  
317 isolated from 3T3 cells transduced with AdGFP/AdGAS5 or transfected with siCtrl/siGAS5.  
318 As shown in Fig. 3E-3F, Smad3 indeed interacted with PPM1A. And importantly,

319 overexpression of GAS5 enhanced Smad3-PPM1A interaction while knockdown of GAS5  
320 suppressed Smad3-PPM1A interaction. These results indicated that GAS5 causes Smad3  
321 dephosphorylation by promoting PPM1A binding to Smad3.

322

### 323 **GAS5 inhibited myofibroblast activation through PPM1A-mediated Smad3** 324 **dephosphorylation.**

325 To determine if PPM1A is important for GAS5 function in Smad3 signaling during  
326 myofibroblast activation, we knocked down PPM1A in 3T3 cells by its siRNA along with  
327 GAS5 overexpression and TGF- $\beta$  treatment. As shown in Fig. 4A-4B, overexpression of GAS5  
328 down-regulated Col1A and  $\alpha$ -SMA expression as well as Smad3 phosphorylation. However,  
329 knockdown of PPM1A rescued, at least partially, the inhibitory effect of GAS5 on Smad3  
330 phosphorylation and Col1A and  $\alpha$ -SMA expression, indicating that PPM1A mediated GAS5  
331 function in Smad3 phosphorylation during the myofibroblast activation.

332 To determine if GAS5 regulates myofibroblast gene expression through Smad3, we  
333 overexpressed GAS5 in 3T3 cells via adenoviral transduction along with transfection of Smad3  
334 expression plasmid followed by TGF- $\beta$  induction. As shown in Fig. 4C-4D, overexpression of  
335 GAS5 suppressed TGF- $\beta$ -induced Col1A expression in 3T3 cells. However, Smad3  
336 overexpression restored the Col1A expression. On the other hand, knockdown of GAS5  
337 increased Col1A expression, but blockade of Smad3 activity by its inhibitor SIS3 demolished  
338 the effect of silencing GAS5 on Col1A expression (Fig. 4E-4F). These results demonstrated  
339 that GAS5 negatively regulated the myofibroblast gene expression by suppressing PPM1A-  
340 induced Smad3 dephosphorylation.

341

### 342 **GAS5 suppressed TGF- $\beta$ induced fibroblast proliferation.**

343 Fibroblast proliferation is one of the main sources for the tissue mass increase during fibrosis  
344 (12, 18). TGF- $\beta$  signaling is known to regulate cell proliferation (1, 4, 24). To confirm the  
345 function of TGF- $\beta$  in fibroblast proliferation, 3T3 cells were treated with 0, 1, 5 or 10 ng/ml  
346 TGF- $\beta$  for 48 hours in serum-free DMEM, following by MTT assay to assess cell proliferation.  
347 As shown in Supplemental Fig. S2A, TGF- $\beta$  increased 3T3 cell proliferation in a dose-  
348 dependent manner. Consistently, PCNA expression was also dose-dependently increased in  
349 response to TGF- $\beta$  (Fig. S2B-2C). To determine the role of GAS5 in TGF- $\beta$ -induced 3T3  
350 proliferation, we overexpressed GAS5 by transducing 3T3 cells with control or adenoviral  
351 vector expressing GAS5 (AdGAS5) followed by treatment with vehicle or 5 ng/ml of TGF- $\beta$   
352 for 48 hours for MTT assay or 24 hours for Western blot. As shown in Figure S2D-2F,  
353 overexpression of GAS5 suppressed TGF- $\beta$ -induced 3T3 proliferation (Fig. S2D) as well as  
354 PCNA protein expression (Fig. S2E-2F). On the other hand, knockdown of GAS5 by its siRNA  
355 increased 3T3 cell proliferation (Fig. S2G) and increased PCNA protein expression (Fig. S2H-  
356 2I). These results indicated that GAS5 suppressed TGF- $\beta$ -induced fibroblast proliferation.

357

### 358 **GAS5 suppressed fibroblast proliferation through TGF- $\beta$ /JNK signaling**

359 It is known that TGF- $\beta$ /Smad signaling cross-talks with multiple non-Smad signaling pathways,  
360 most often PI3K/Akt, JNK and p38 pathways, to regulate cell proliferation (2, 3, 17, 23, 41,  
361 59). To determine if GAS5 inhibits fibroblast proliferation by targeting these signaling  
362 pathways, we assessed the phosphorylation of key components in PI3K/Akt, JNK and p38  
363 signaling pathways in TGF- $\beta$ -treated 3T3 cells. As shown in Supplemental Figure S3A-3B,  
364 TGF- $\beta$  increased Akt and JNK phosphorylation, suggesting these signaling pathways were  
365 activated during TGF- $\beta$ -induced fibroblast proliferation. However, comparing to AdGFP-  
366 transduced cells, overexpression of GAS5 (AdGAS5) suppressed JNK phosphorylation while  
367 had no effect on p38 phosphorylation and increased the Akt phosphorylation (Fig. S3A-3B).  
368 These results suggested that GAS5 suppressed TGF- $\beta$ -induced fibroblast proliferation only



369 through JNK pathway. To further validate the function of JNK signaling in GAS5-regulated  
370 fibroblast proliferation, we knocked down GAS5 in 3T3 cells via siRNA transfection followed  
371 by treatment with vehicle or JNK pathway inhibitor, SP600125. As shown in Fig. S3C,  
372 knockdown of GAS5 increased 3T3 cell proliferation, but JNK inhibitor reversed the effect of  
373 GAS5. These results demonstrated that GAS5 inhibits fibroblast proliferation through  
374 interfering with TGF- $\beta$ -JNK pathways.

375

### 376 **In vivo local delivery of GAS5 via adenoviral vector suppressed skin fibrosis in mice.**

377 Since fibroblast activation is an important mechanism underlying pathological tissue/organ  
378 fibrosis, we tested the function of GAS5 in skin fibrosis by using a bleomycin-induced TGF- $\beta$ -  
379  $\beta$ -dependent skin sclerosis model (43). GAS5 was overexpressed via adenoviral delivery in  
380 bleomycin-treated mouse skin. As shown in Fig. 5A-5D, overexpression of GAS5 attenuated  
381 bleomycin-induced skin sclerosis as indicated by the reduction of both skin thickness (Fig. 5A-  
382 5B) and skin tissue collagen deposition (Fig. 5C-5D). Immunohistochemistry (IHC) staining  
383 showed that Col1A- (Fig. 5E-5F) and  $\alpha$ SMA-positive cells (Fig. 5G-5H) were significantly  
384 reduced in AdGAS5-transduced skin tissues, suggesting that GAS5 inhibited bleomycin-  
385 caused skin fibrosis. Moreover, overexpression of GAS5 decreased Col1A and  $\alpha$ -SMA protein  
386 expression (Fig. 6A-6B) in bleomycin-treated skins. Importantly, GAS5 reduced the Smad3  
387 binding to the Col1A and  $\alpha$ -SMA promoters in a chromatin setting in vivo in the bleomycin-  
388 treated skin tissues (Fig. 6C-6F), confirming that GAS5 impedes skin fibrogenesis by inhibiting  
389 Smad3-mediated transcription of myofibroblast genes.

390

## 391 **Discussion**

392

393 Fibrosis is a chronic wound healing progress characterized by fibroblast activation involving  
394 fibroblast proliferation and fibroblast-myofibroblast transition (20, 42). In this study, we  
395 identified lncRNA GAS5 as an essential regulator for TGF- $\beta$ -induced fibroblast activation and  
396 skin fibrosis. Specifically, GAS5 directly bound to both Smad3 and PPM1A, thus promoted  
397 Smad3 dephosphorylation and suppressed Smad3-induced myofibroblast activation. In  
398 addition, GAS5 inhibited 3T3 cell proliferation via blocking JNK signaling (Fig. 7).  
399 Importantly, Local adenoviral delivery of GAS5 effectively suppressed bleomycin-induced  
400 skin fibrosis in mice, suggesting that GAS5 may be used as a promising RNA-based therapeutic  
401 agent for treating fibrotic diseases.

402

403 LncRNA normally functions as a suppressive protein sponge for transcription factors (27, 49).  
404 LncRNA can also serve as a scaffold RNA which brings spatial proximity of different  
405 components thus facilitates protein complex formation and enhances their functions (45, 52).  
406 GAS5 has been shown to regulate different signaling cascades through recruiting protein co-  
407 factors to form RNA-Protein complex (RNP). Indeed, we have previously identified GAS5 as  
408 a Smad3 sponge RNA in the initial stage of TGF- $\beta$  signaling transduction. In the current study,  
409 we identified a new function of GAS5 at a later stage of TGF- $\beta$  signaling. I.e., GAS5 can  
410 quench the persistent TGF- $\beta$ /Smad signaling observed in fibrosis by promoting PPM1A-  
411 mediated Smad3 dephosphorylation. Although transient TGF- $\beta$  activity is important for tissue  
412 repair/regeneration, persistent TGF- $\beta$  signaling results in fibrosis and scarring in fibrotic  
413 disease (11, 30). Our results suggested that GAS5 may act as a brake for the persistent TGF- $\beta$   
414 signaling in tissue fibrosis. GAS5 affects myofibroblast marker gene Col1A and  $\alpha$ -SMA  
415 expression at both basal and TGF- $\beta$ -treated states, suggesting that GAS5 may be required for  
416 maintaining fibroblast homeostasis of the quiescent cells. Interestingly, the effect of silencing  
417 GAS5 on  $\alpha$ -SMA is much less than Col1A in the basal state, which is probably because  $\alpha$ -  
418 SMA expression is also regulated by many factors other than GAS5. Of significance, GAS5

419 has more profound impacts on Col1A and  $\alpha$ -SMA expression in TGF- $\beta$ -treated cells,  
420 suggesting that GAS5 may be more important and powerful in blocking the fibroblast  
421 activation and fibrosis than maintaining quiescent cell activity. Indeed, GAS5 has also been  
422 identified as an anti-fibrotic lncRNA in cardiac and hepatic fibrosis although the mechanism is  
423 mainly through functioning as a miRNA sponge (16, 50, 56). Whether GAS5 regulates TGF-  
424  $\beta$ /Smad signaling through sponging miRNAs in skin fibrosis requires further studies.

425  
426 TGF- $\beta$  not only initiates fibroblast-myofibroblast transition but also stimulates fibroblast  
427 proliferation, usually through cross-talking with Smad independent pathways, such as  
428 PI3K/Akt, JNK and p38 (1, 4, 24). Given the fact that GAS5 is a potent anti-proliferation  
429 lncRNA, it is expected that GAS5 also suppresses TGF- $\beta$ -induced fibroblast proliferation.  
430 Although previous studies have shown that TGF- $\beta$  signaling interacts with almost all major  
431 cellular signaling pathways (54), our results indicate that JNK is the major downstream  
432 signaling pathway mediating GAS5 function in TGF- $\beta$ -induced fibroblast proliferation. There  
433 are reports showing that knockdown of GAS5 suppresses JNK phosphorylation in primary  
434 retinal ganglion cells and a neuroblastoma cell line (34, 60). These discrepancies in GAS5  
435 function may be due to cell type-specific effects. How GAS5 interacts with JNK signaling, and  
436 whether the interaction between GAS5 and JNK signaling is Smad3-dependent are interesting  
437 subjects for future studies.

438  
439 In the progression of fibrogenesis, intensive interplays occur among different cell types.  
440 Epithelial cells, fibroblast, smooth muscle cells and immune cells all have shown to play  
441 important roles in this chronic disease (21, 28, 39). M2 macrophages, for example, is known  
442 to play important roles not only in the initial wound healing response (anti-fibrotic) but also in  
443 the later TGF- $\beta$  secretion and fibroblast activation stages (pro-fibrotic) (9). Interestingly, GAS5  
444 has been reported to inhibit M2 macrophage polarization (44). Thus, GAS5 may have many  
445 unidentified functions in fibrosis. For example, it could coordinate or modulate TGF- $\beta$   
446 signaling among different cell types during fibrogenesis. The investigation into these topics  
447 may shed new light on the RNA-based therapy in treating TGF- $\beta$ -related fibrotic diseases.

448

#### 449 **Acknowledgments**

450

451 This work was supported by grants from National Institutes of Health (HL123302,  
452 HL119053, HL135854, and HL147313 to S.-Y.C.) and VA merit Award (I01 BX004065-1 to  
453 K. F. S). R. T. is a recipient of Stanford University School of Medicine Dean's Postdoctoral  
454 Fellowship and a TRDRP Postdoctoral Fellowship (27FT-0044).

455

456 **Disclosures:** None

457

458 **Endnotes:**

459

460 The Supplemental Materials are available in the following link:

461

462 <https://doi.org/10.6084/m9.figshare.12140880>

463

464

465 **Reference:**

466

- 467 1. **Abdullah N, Torres B, Basu M, and Johnson H.** Differential effects of epidermal  
468 growth factor, transforming growth factor- $\alpha$ , and vaccinia virus growth factor in the  
469 positive regulation of IFN- $\gamma$  production. *The Journal of Immunology* 143: 113-117,  
470 1989.
- 471 2. **Bakin AV, Rinehart C, Tomlinson AK, and Arteaga CL.** p38 mitogen-activated  
472 protein kinase is required for TGF $\beta$ -mediated fibroblastic transdifferentiation and cell  
473 migration. *Journal of cell science* 115: 3193-3206, 2002.
- 474 3. **Battegay EJ, Raines EW, Seifert RA, Bowen-Pope DF, and Ross R.** TGF- $\beta$   
475 induces bimodal proliferation of connective tissue cells via complex control of an autocrine  
476 PDGF loop. *Cell* 63: 515-524, 1990.
- 477 4. **Bettinger DA, Yager DR, Diegelmann RF, and Cohen IK.** The effect of TGF- $\beta$  on  
478 keloid fibroblast proliferation and collagen synthesis. *Plastic and reconstructive surgery*  
479 98: 827-833, 1996.
- 480 5. **Biernacka A, Dobaczewski M, and Frangogiannis NG.** TGF- $\beta$  signaling in fibrosis.  
481 *Growth factors* 29: 196-202, 2011.
- 482 6. **Bonfield TL, Panuska JR, Konstan MW, Hilliard KA, Hilliard JB, Ghnaim H,  
483 and Berger M.** Inflammatory cytokines in cystic fibrosis lungs. *American journal of  
484 respiratory and critical care medicine* 152: 2111-2118, 1995.
- 485 7. **Border WA, and Noble NA.** Transforming growth factor  $\beta$  in tissue fibrosis. *New  
486 England Journal of Medicine* 331: 1286-1292, 1994.
- 487 8. **Bourgeois B, Gilquin B, Tellier-Lebègue C, Östlund C, Wu W, Pérez J, El Hage  
488 P, Lallemand F, Worman HJ, and Zinn-Justin S.** Inhibition of TGF- $\beta$  signaling at the  
489 nuclear envelope: characterization of interactions between MAN1, Smad2 and Smad3, and  
490 PPM1A. *Sci Signal* 6: ra49-ra49, 2013.
- 491 9. **Braga TT, Agudelo JSH, and Camara NOS.** Macrophages during the fibrotic  
492 process: M2 as friend and foe. *Frontiers in immunology* 6: 602, 2015.
- 493 10. **Bruce DL, and Sapkota GP.** Phosphatases in SMAD regulation. *FEBS letters* 586:  
494 1897-1905, 2012.
- 495 11. **Cutroneo KR.** TGF- $\beta$ -induced fibrosis and SMAD signaling: oligo decoys as natural  
496 therapeutics for inhibition of tissue fibrosis and scarring. *Wound Repair and Regeneration*  
497 15: S54-S60, 2007.
- 498 12. **Daly TJ, and Weston WL.** Retinoid effects on fibroblast proliferation and collagen  
499 synthesis in vitro and on fibrotic disease in vivo. *Journal of the American Academy of  
500 Dermatology* 15: 900-902, 1986.
- 501 13. **Daniels CE, Wilkes MC, Edens M, Kottom TJ, Murphy SJ, Limper AH, and  
502 Leof EB.** Imatinib mesylate inhibits the profibrogenic activity of TGF- $\beta$  and prevents  
503 bleomycin-mediated lung fibrosis. *The Journal of clinical investigation* 114: 1308-1316,  
504 2004.
- 505 14. **Derynck R, and Zhang YE.** Smad-dependent and Smad-independent pathways in  
506 TGF- $\beta$  family signalling. *Nature* 425: 577-584, 2003.
- 507 15. **Dong K, Guo X, Chen W, Hsu AC, Shao Q, Chen J-F, and Chen S-Y.**  
508 Mesenchyme homeobox 1 mediates transforming growth factor- $\beta$  (TGF- $\beta$ )-induced smooth  
509 muscle cell differentiation from mouse mesenchymal progenitors. *Journal of Biological  
510 Chemistry* 293: 8712-8719, 2018.
- 511 16. **Dong Z, Li S, Wang X, Si L, Ma R, Bao L, and Bo A.** lncRNA GAS5 restrains  
512 CCl<sub>4</sub>-induced hepatic fibrosis by targeting miR-23a through the PTEN/PI3K/Akt signaling  
513 pathway. *American Journal of Physiology-Gastrointestinal and Liver Physiology* 316: G539-  
514 G550, 2019.

- 515 17. **Engel ME, McDonnell MA, Law BK, and Moses HL.** Interdependent SMAD and  
516 JNK signaling in transforming growth factor- $\beta$ -mediated transcription. *Journal of Biological*  
517 *Chemistry* 274: 37413-37420, 1999.
- 518 18. **Garbuzenko E, Nagler A, Pickholtz D, Gillery P, Reich R, Maquart FX, and**  
519 **Levi-Schaffer F.** Human mast cells stimulate fibroblast proliferation, collagen synthesis and  
520 lattice contraction: a direct role for mast cells in skin fibrosis. *Clinical & Experimental*  
521 *Allergy* 32: 237-246, 2002.
- 522 19. **Giri SN, Hyde DM, and Hollinger MA.** Effect of antibody to transforming growth  
523 factor beta on bleomycin induced accumulation of lung collagen in mice. *Thorax* 48: 959-  
524 966, 1993.
- 525 20. **Grotendorst GR, Rahmanie H, and Duncan MR.** Combinatorial signaling  
526 pathways determine fibroblast proliferation and myofibroblast differentiation. *The FASEB*  
527 *Journal* 18: 469-479, 2004.
- 528 21. **Hays S, Ferrando R, Carter R, Wong H, and Woodruff P.** Structural changes to  
529 airway smooth muscle in cystic fibrosis. *Thorax* 60: 226-228, 2005.
- 530 22. **Heymann F, Trautwein C, and Tacke F.** Monocytes and macrophages as cellular  
531 targets in liver fibrosis. *Inflammation & Allergy-Drug Targets (Formerly Current Drug*  
532 *Targets-Inflammation & Allergy)* 8: 307-318, 2009.
- 533 23. **Huang SS, and Huang JS.** TGF- $\beta$  control of cell proliferation. *Journal of cellular*  
534 *biochemistry* 96: 447-462, 2005.
- 535 24. **Huang W-Y, Li Z-G, Rus H, Wang X, Jose PA, and Chen S-Y.** RGC-32 mediates  
536 transforming growth factor- $\beta$ -induced epithelial-mesenchymal transition in human renal  
537 proximal tubular cells. *Journal of Biological Chemistry* 284: 9426-9432, 2009.
- 538 25. **Huarte M.** The emerging role of lncRNAs in cancer. *Nature medicine* 21: 1253-1261,  
539 2015.
- 540 26. **Huax F, Liu T, McGarry B, Ullenbruch M, Xing Z, and Phan SH.** Eosinophils  
541 and T lymphocytes possess distinct roles in bleomycin-induced lung injury and fibrosis. *The*  
542 *Journal of Immunology* 171: 5470-5481, 2003.
- 543 27. **Kino T, Hurt DE, Ichijo T, Nader N, and Chrousos GP.** Noncoding RNA gas5 is a  
544 growth arrest- and starvation-associated repressor of the glucocorticoid receptor. *Sci Signal* 3:  
545 ra8-ra8, 2010.
- 546 28. **Krieg T, Abraham D, and Lafyatis R.** Fibrosis in connective tissue disease: the role  
547 of the myofibroblast and fibroblast-epithelial cell interactions. *Arthritis research & therapy*  
548 9: S4, 2007.
- 549 29. **Leask A, and Abraham DJ.** TGF- $\beta$  signaling and the fibrotic response. *The FASEB*  
550 *Journal* 18: 816-827, 2004.
- 551 30. **Leask A, Denton CP, and Abraham DJ.** Insights into the molecular mechanism of  
552 chronic fibrosis: the role of connective tissue growth factor in scleroderma. *Journal of*  
553 *Investigative Dermatology* 122: 1-6, 2004.
- 554 31. **Lu Q, Ren S, Lu M, Zhang Y, Zhu D, Zhang X, and Li T.** Computational  
555 prediction of associations between long non-coding RNAs and proteins. *BMC genomics* 14:  
556 651, 2013.
- 557 32. **Luzina IG, Todd NW, Iacono AT, and Atamas SP.** Roles of T lymphocytes in  
558 pulmonary fibrosis. *Journal of leukocyte biology* 83: 237-244, 2008.
- 559 33. **Massagué J, and Chen Y-G.** Controlling TGF- $\beta$  signaling. *Genes & development* 14:  
560 627-644, 2000.
- 561 34. **Miao X, and Liang A.** Knockdown of long noncoding RNA GAS5 attenuates H2O2-  
562 induced damage in retinal ganglion cells through upregulating miR-124: Potential role in  
563 traumatic brain injury. *Journal of cellular biochemistry* 120: 2313-2322, 2019.



- 564 35. **Miyazono K.** TGF- $\beta$  signaling by Smad proteins. *Cytokine & growth factor reviews*  
565 11: 15-22, 2000.
- 566 36. **Mourtada-Maarabouni M, Pickard M, Hedge V, Farzaneh F, and Williams G.**  
567 GAS5, a non-protein-coding RNA, controls apoptosis and is downregulated in breast cancer.  
568 *Oncogene* 28: 195-208, 2009.
- 569 37. **Pedroza M, Le TT, Lewis K, Karmouty-Quintana H, To S, George AT,**  
570 **Blackburn MR, Twardy DJ, and Agarwal SK.** STAT-3 contributes to pulmonary fibrosis  
571 through epithelial injury and fibroblast-myofibroblast differentiation. *The FASEB Journal* 30:  
572 129-140, 2015.
- 573 38. **Phan SH.** The myofibroblast in pulmonary fibrosis. *Chest* 122: 286S-289S, 2002.
- 574 39. **Sakai N, and Tager AM.** Fibrosis of two: Epithelial cell-fibroblast interactions in  
575 pulmonary fibrosis. *Biochimica et Biophysica Acta (BBA)-Molecular Basis of Disease* 1832:  
576 911-921, 2013.
- 577 40. **Simonian PL, Roark CL, Wehrmann F, Lanham AK, del Valle FD, Born WK,**  
578 **O'Brien RL, and Fontenot AP.** Th17-polarized immune response in a murine model of  
579 hypersensitivity pneumonitis and lung fibrosis. *The Journal of Immunology* 182: 657-665,  
580 2009.
- 581 41. **Song K, Wang H, Krebs TL, and Danielpour D.** Novel roles of Akt and mTOR in  
582 suppressing TGF- $\beta$ /ALK5-mediated Smad3 activation. *The EMBO journal* 25: 58-69, 2006.
- 583 42. **Strutz F, and Zeisberg M.** Renal fibroblasts and myofibroblasts in chronic kidney  
584 disease. *Journal of the American Society of Nephrology* 17: 2992-2998, 2006.
- 585 43. **Sun C, and Chen S-Y.** RGC32 promotes bleomycin-induced systemic sclerosis in a  
586 murine disease model by modulating classically activated macrophage function. *The Journal*  
587 *of Immunology* 200: 2777-2785, 2018.
- 588 44. **Sun D, Yu Z, Fang X, Liu M, Pu Y, Shao Q, Wang D, Zhao X, Huang A, and**  
589 **Xiang Z.** LncRNA GAS5 inhibits microglial M2 polarization and exacerbates demyelination.  
590 *EMBO reports* 18: 1801-1816, 2017.
- 591 45. **Sun M, Nie F, Wang Y, Zhang Z, Hou J, He D, Xie M, Xu L, De W, and Wang Z.**  
592 LncRNA HOXA11-AS promotes proliferation and invasion of gastric cancer by scaffolding  
593 the chromatin modification factors PRC2, LSD1, and DNMT1. *Cancer research* 76: 6299-  
594 6310, 2016.
- 595 46. **Takagawa S, Lakos G, Mori Y, Varga J, Yamamoto T, and Nishioka K.**  
596 Sustained activation of fibroblast transforming growth factor- $\beta$ /Smad signaling in a murine  
597 model of scleroderma. *Journal of investigative dermatology* 121: 41-50, 2003.
- 598 47. **Tang R, Mei X, Wang Y-C, Cui X-B, Zhang G, Li W, and Chen S-Y.** LncRNA  
599 GAS5 regulates vascular smooth muscle cell cycle arrest and apoptosis via p53 pathway.  
600 *Biochimica et Biophysica Acta (BBA)-Molecular Basis of Disease* 1865: 2516-2525, 2019.
- 601 48. **Tang R, Zhang G, and Chen S-Y.** Smooth muscle cell proangiogenic phenotype  
602 induced by Cyclopentenyl Cytosine promotes endothelial cell proliferation and migration.  
603 *Journal of Biological Chemistry* 291: 26913-26921, 2016.
- 604 49. **Tang R, Zhang G, Wang Y-C, Mei X, and Chen S-Y.** The long non-coding RNA  
605 GAS5 regulates transforming growth factor  $\beta$  (TGF- $\beta$ )-induced smooth muscle cell  
606 differentiation via RNA Smad-binding elements. *Journal of Biological Chemistry* 292:  
607 14270-14278, 2017.
- 608 50. **Tao H, Zhang J-G, Qin R-H, Dai C, Shi P, Yang J-J, Deng Z-Y, and Shi K-H.**  
609 LncRNA GAS5 controls cardiac fibroblast activation and fibrosis by targeting miR-21 via  
610 PTEN/MMP-2 signaling pathway. *Toxicology* 386: 11-18, 2017.
- 611 51. **Todd NW, Luzina IG, and Atamas SP.** Molecular and cellular mechanisms of  
612 pulmonary fibrosis. *Fibrogenesis & tissue repair* 5: 11, 2012.



- 613 52. **Wang KC, and Chang HY.** Molecular mechanisms of long noncoding RNAs.  
614 *Molecular cell* 43: 904-914, 2011.
- 615 53. **Wynn TA.** Cellular and molecular mechanisms of fibrosis. *The Journal of Pathology: A Journal of the Pathological Society of Great Britain and Ireland* 214: 199-210, 2008.
- 616 54. **Xiao L, Du Y, Shen Y, He Y, Zhao H, and Li Z.** TGF-beta 1 induced fibroblast  
617 proliferation is mediated by the FGF-2/ERK pathway. *Front Biosci (Landmark Ed)* 17: 2667-  
618 2674, 2012.
- 619 55. **Xie W-B, Li Z, Miano JM, Long X, and Chen S-Y.** Smad3-mediated Myocardin  
620 Silencing A NOVEL MECHANISM GOVERNING THE INITIATION OF SMOOTH  
621 MUSCLE DIFFERENTIATION. *Journal of Biological Chemistry* 286: 15050-15057, 2011.
- 622 56. **Yu F, Zheng J, Mao Y, Dong P, Lu Z, Li G, Guo C, Liu Z, and Fan X.** Long non-  
623 coding RNA growth arrest-specific transcript 5 (GAS5) inhibits liver fibrogenesis through a  
624 mechanism of competing endogenous RNA. *Journal of Biological Chemistry* 290: 28286-  
625 28298, 2015.
- 626 57. **Zeisberg EM, Potenta SE, Sugimoto H, Zeisberg M, and Kalluri R.** Fibroblasts in  
627 kidney fibrosis emerge via endothelial-to-mesenchymal transition. *Journal of the American*  
628 *Society of Nephrology* 19: 2282-2287, 2008.
- 629 58. **Zeisberg M, Bonner G, Maeshima Y, Colorado P, Müller GA, Strutz F, and**  
630 **Kalluri R.** Renal fibrosis: collagen composition and assembly regulates epithelial-  
631 mesenchymal transdifferentiation. *The American journal of pathology* 159: 1313-1321, 2001.
- 632 59. **Zhang YE.** Non-Smad pathways in TGF- $\beta$  signaling. *Cell research* 19: 128-139,  
633 2009.
- 634 60. **Zhou X-B, Lai L-F, Xie G-B, Ding C, Xu X, and Wang Y.** LncRNA GAS5  
635 sponges miRNA-221 to promote neurons apoptosis by up-regulated PUMA under hypoxia  
636 condition. *Neurological Research* 1-9, 2019.

637  
638  
639 **Figure Legends:**

640  
641 **Figure 1: LncRNA GAS5 was downregulated in fibroblasts by TGF- $\beta$ .** A-D), TGF- $\beta$   
642 (5ng/ml) induced the expression of myofibroblast cell marker Coll1A and  $\alpha$ SMA in 3T3  
643 fibroblasts (A-B) and primary skin fibroblasts (C-D). B) Quantification of protein expression  
644 in A by normalizing to  $\alpha$ -Tubulin. D) Quantification of protein expression in C by normalizing  
645 to  $\alpha$ -Tubulin. E) TGF- $\beta$  down-regulated GAS5 in 3T3 fibroblasts in a dose-dependent manner.  
646 3T3 fibroblasts were cultured in serum-free DMEM with 0, 1, 2, 5, or 10 ng/ml of TGF- $\beta$  for  
647 12 hrs. GAS5 was detected by RT-qPCR. F) TGF- $\beta$  (5ng/ml) down-regulated GAS5 in primary  
648 mouse skin fibroblasts. G) GAS5 was down-regulated in skin tissues with bleomycin treatment,  
649 as analyzed by RT-qPCR. C57BL/6 mice were injected subcutaneously with bleomycin (Bleo;  
650 0.02 U) every other day for 14 days. GAS5 RNA expression was calculated by normalizing to  
651 cyclophilin mRNA. H) GAS5 positive cells in skin tissues were decreased by bleomycin  
652 treatment. Skin tissues from (G) was fixed in 4% PFA, and GAS5 positive cells were shown  
653 by RNA-FISH staining. Positive and false-positive staining were indicated by white and yellow  
654 arrows, respectively. I) Quantification of GAS5-expressing cells by counting the positive  
655 staining from 10 different fields, shown as the fold change. Bar: 200 $\mu$ m. \* p<0.05; \*\* p<0.01;  
656 n=3-5. All values are presented as means  $\pm$  SEM. T-tests were performed for B, D, F, G, I, and  
657 one-way ANOVA test was performed for E.

658  
659 **Figure 2. GAS5 suppressed TGF- $\beta$ -induced fibroblast-myofibroblast transition.** A-B)  
660 GAS5 suppressed  $\alpha$ SMA and Coll1A protein expression. 3T3 cells were transduced with  
661 AdGFP or AdGAS5 followed by vehicle or 5 ng/ml of TGF- $\beta$  treatment for 24 hrs.  $\alpha$ SMA and  
662 Coll1A expression was assessed by Western blot (A) and quantified by normalizing to  $\alpha$ -

663 Tubulin (B). **C-D**) Knockdown of GAS5 increased  $\alpha$ SMA and Col1A protein expression. 3T3  
664 cells were transfected with siCtrl or siGAS5 followed by vehicle or 5 ng/ml of TGF- $\beta$  treatment  
665 for 24 hrs.  $\alpha$ SMA and Col1A expression was assessed by Western blot (C) and quantified by  
666 normalizing to  $\alpha$ -Tubulin (D). **E**) GAS5 suppressed TGF- $\beta$ -induced  $\alpha$ SMA and Col1A mRNA  
667 expression. 3T3 cells were transduced with AdGFP or AdGAS5 followed by vehicle (Basal)  
668 or 5 ng/ml of TGF- $\beta$  treatment for 12 hrs. mRNA expression was assessed by RT-qPCR and  
669 normalized to cyclophilin. **F**) Knockdown of GAS5 increased  $\alpha$ SMA and Col1A mRNA  
670 expression. 3T3 cells were transfected with siCtrl or siGAS5 followed by vehicle (Basal) or 5  
671 ng/ml of TGF- $\beta$  treatment for 12 hrs. mRNA expression was assessed by qPCR and normalized  
672 to cyclophilin. **G**) GAS5 suppressed TGF- $\beta$ -induced  $\alpha$ SMA promoter activity. 3T3 cells were  
673 transduced with AdGFP or AdGAS5 and transfected with  $\alpha$ SMA promoter luciferase reporter  
674 for 24 hours prior to the treatment with vehicle (-) or 5 ng/ml of TGF- $\beta$  for 8 hours. Luciferase  
675 assays were performed. NS: not significant; \*  $p < 0.05$ ; \*\*  $p < 0.01$ ;  $n = 3$ . All values are presented  
676 as means  $\pm$  SEM. one-way ANOVA tests were performed.  
677

678 **Figure 3. GAS5 promoted Smad3 dephosphorylation through facilitating PPM1A**  
679 **binding to Smad3.** **A**) GAS5 accelerated Smad3 dephosphorylation in TGF- $\beta$ -treated  
680 fibroblasts. 3T3 cells were transduced with AdGFP or AdGAS5 followed by vehicle (0 h) or  
681 5 ng/ml of TGF- $\beta$  treatment for 2 or 4 h. Phospho- and total Smad2 and Smad3 were detected  
682 by Western blot. **B**) Phospho-Smad2 and Phospho-Smad3 were quantified by normalizing to  
683 their total protein, respectively. **C**) GAS5 bound to Smad3 as shown by RIP assay. Smad3- and  
684 Smad4-interacting molecules in 3T3 cells were pulled down by their antibodies, respectively.  
685 The presence of GAS5 was detected via qPCR. **D**) GAS5 bound PPM1A in 3T3 fibroblasts.  
686 PPM1A-interacting molecules in 3T3 cells was pulled down by its antibody, and the presence  
687 of GAS5 was detected by qPCR. **E-F**) Overexpression of GAS5 promoted while Knockdown  
688 of GAS5 suppressed Smad3-PPM1A interaction. 3T3 cells were transduced with AdGFP or  
689 AdGAS5 (E) or transfected with siCtrl or siGAS5 (F) as indicated for 24 h. Co-  
690 immunoprecipitation was performed by using PPM1A antibody, and the presence of Smad3  
691 was detected by Western blot. \*\*  $p < 0.01$ ;  $n = 3$ . All values are presented as means  $\pm$  SEM. One-  
692 way ANOVA tests were performed for B, C, and T-test was performed for D.  
693

694 **Figure 4. GAS5 regulated myofibroblast transition through PPM1A-induced Smad3**  
695 **dephosphorylation.** **A-B**) Knockdown of PPM1A rescued the inhibitory effect of GAS5 on  
696 Smad3 phosphorylation and myofibroblast marker gene expression. 3T3 cells were transduced  
697 with AdGFP or AdGAS5 along with transfection of siCtrl or siPPM1A followed by vehicle (-)  
698 or TGF- $\beta$  treatment (5 ng/ml) for 24 hours. Protein expression was assessed by Western blot  
699 (A) and quantified by normalizing to  $\alpha$ -Tubulin (for  $\alpha$ SMA and Col1A) or total Smad3 (for  
700 pSmad3) (B). **C-D**) Overexpression of Smad3 rescued GAS5-blocked Col1A expression. 3T3  
701 cells were transduced with AdGFP or AdGAS5 and transfected with control or Smad3  
702 expression plasmid followed by vehicle or TGF- $\beta$  treatment (5 ng/ml) for 24 hours. Col1A  
703 expression was assessed by Western blot (C) and quantified by normalizing to  $\alpha$ -Tubulin (D).  
704 **E-F**) Smad3 inhibitor SIS3 blunted GAS5 knockdown-enhanced Col1A expression. 3T3 cells  
705 were transfected with siCtrl or siGAS5 followed by vehicle or SIS3 (10  $\mu$ M) treatment for 24  
706 hours. Col1A expression was assessed by Western blot (E) and quantified by normalizing to  
707  $\alpha$ -Tubulin (F). \*\*  $p < 0.01$ ;  $n = 3$ . All values are presented as means  $\pm$  SEM. One-way ANOVA  
708 tests were performed.  
709

710 **Figure 5. GAS5 suppressed skin fibrosis in mice.** **A-D**) Forced expression of GAS5 via local  
711 adenoviral delivery suppressed bleomycin-induced skin fibrosis in mice. Mouse skins were  
712 treated with vehicle (PBS) or bleomycin (0.02U/day) every other day for 28 days. The skin

713 tissues were stained with H&E for structural changes (A), Masson's trichrome (MT) for  
714 collagen deposition (C). Bar: 200  $\mu$ m. Skin thicknesses shown in A were averaged from 10  
715 different fields (B), and collagen deposition in C was quantified by measuring the staining  
716 intensity from 10 different fields (D). **E-H**) Forced expression of GAS5 via local adenoviral  
717 delivery suppressed bleomycin-induced expression of Col1A (E-F) and  $\alpha$ SMA (G-H). Bar: 100  
718  $\mu$ m. Skin tissue sections underwent immunohistochemistry (IHC) staining using Col1A (E)  
719 and  $\alpha$ SMA (G) antibodies, respectively. Col1A (F) and  $\alpha$ SMA (H)-positive cells were averaged  
720 from 10 different fields. The large rectangle inserts are enlarged images from the small  
721 rectangle boxes in C, E and G, respectively. \*  $p < 0.05$ ; \*\*  $p < 0.01$ ;  $n = 5$ . All values are presented  
722 as means  $\pm$  SEM. One-way ANOVA tests were performed.

723

724 **Figure 6. GAS5 inhibited Col1A and  $\alpha$ SMA protein expression in fibrotic skin tissues and**  
725 **attenuated Smad3 binding to their promoters in vivo.** **A)** GAS5 suppressed Col1A and  
726  $\alpha$ SMA protein expression in skin tissues with bleomycin-induced fibrosis. **B)** Col1a and  
727  $\alpha$ SMA protein levels in (A) were quantified by normalizing to GAPDH. \*\*  $p < 0.01$ ;  $n = 5$ . **C-**  
728 **F)** GAS5 suppressed Smad3 binding to Col1a (C-D) and  $\alpha$ -SMA (E-F) promoters in vivo that  
729 were significantly enriched during bleomycin-induced skin fibrosis. Smad3 binding to Col1a  
730 (C) and  $\alpha$ -SMA (E) promoters in a chromatin setting was measured by in vivo chromatin  
731 immunoprecipitation (CHIP) assay. Smad3 binding enrichments were quantified by qPCR  
732 relative to the Smad3 binding in vehicle-treated skin tissues (D-F). \*\*  $p < 0.01$  vs AdGFP-  
733 treated groups;  $n = 5$ . All values are presented as means  $\pm$  SEM. One-way ANOVA tests were  
734 performed.

735

736 **Figure 7. A diagram of GAS5 function in TGF- $\beta$ -induced skin fibrosis.** During the onset  
737 of skin fibrosis, infiltrating immune cells secrete TGF- $\beta$ , which activates resident fibroblasts  
738 through Smad3 signaling pathway. GAS5 suppresses the progression of fibrosis by promoting  
739 Smad3 dephosphorylation through facilitating PPM1A binding to Smad3, thus inhibiting  
740 Smad3-mediated myofibroblast activation. GAS5 also inhibits fibroblast proliferation through  
741 impeding JNK signaling pathway.

742

743

744

Fig 1

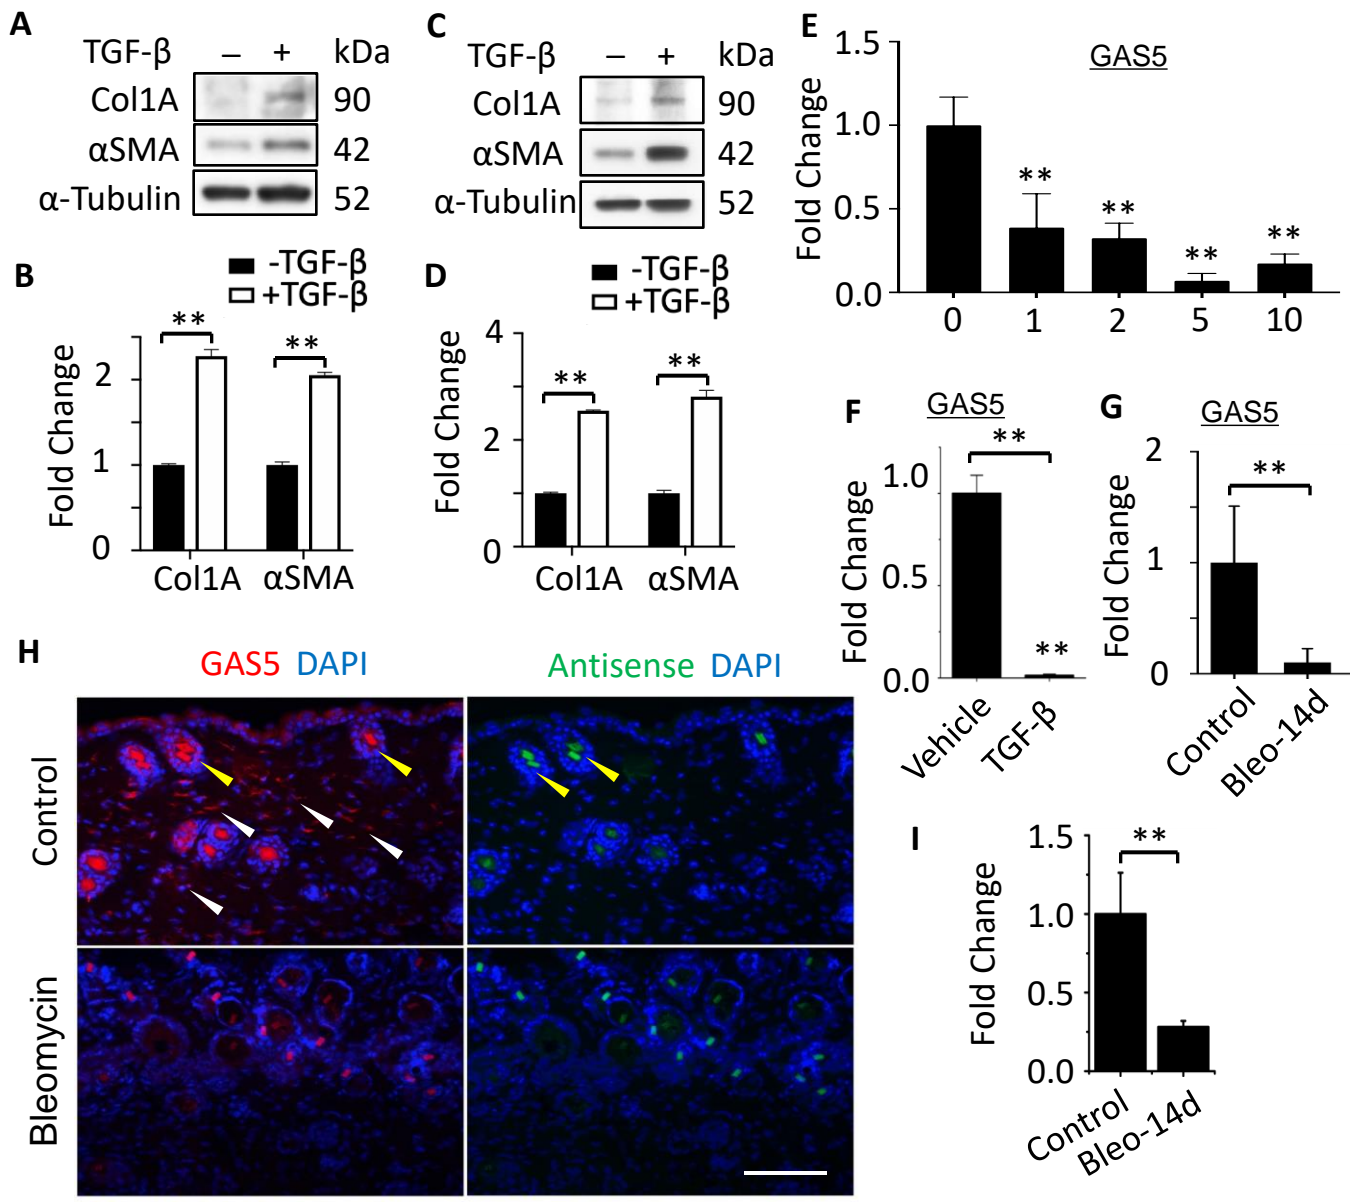

Fig 2

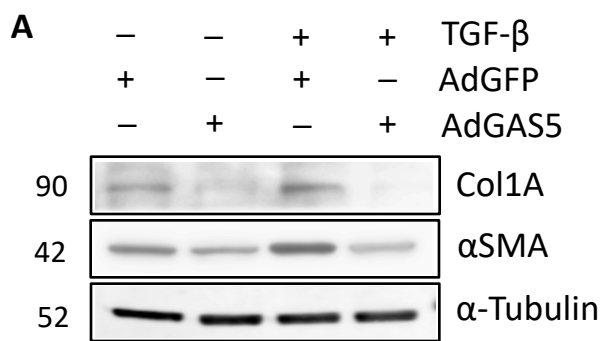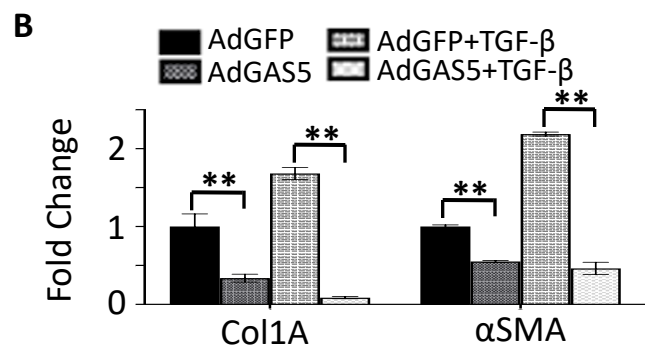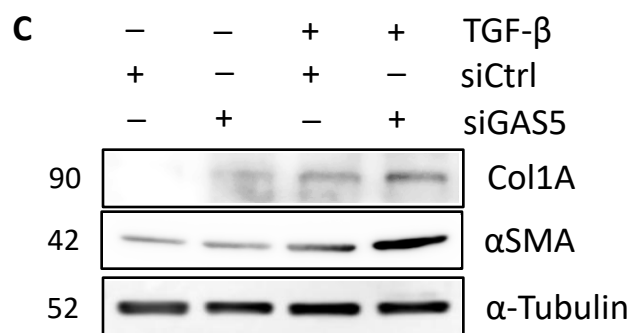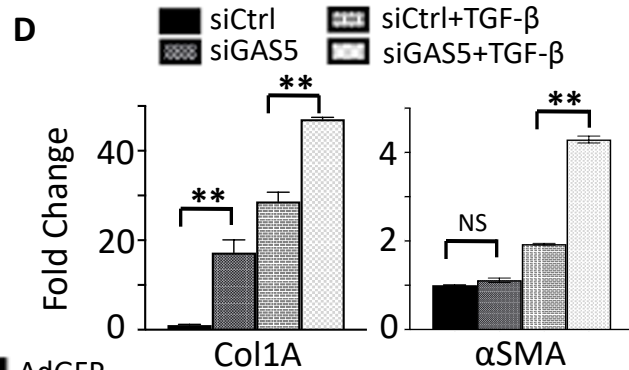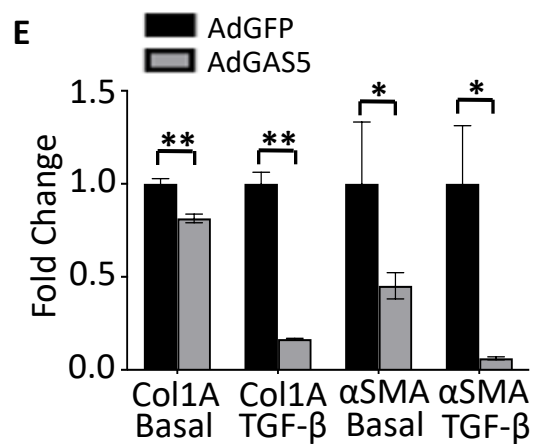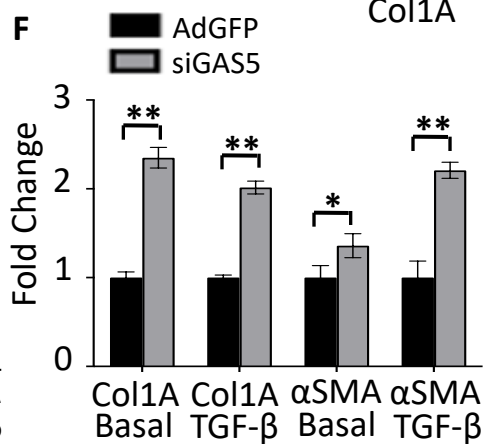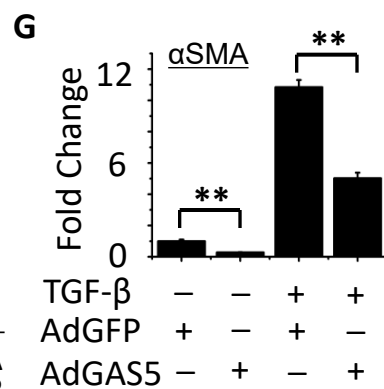



Fig 3

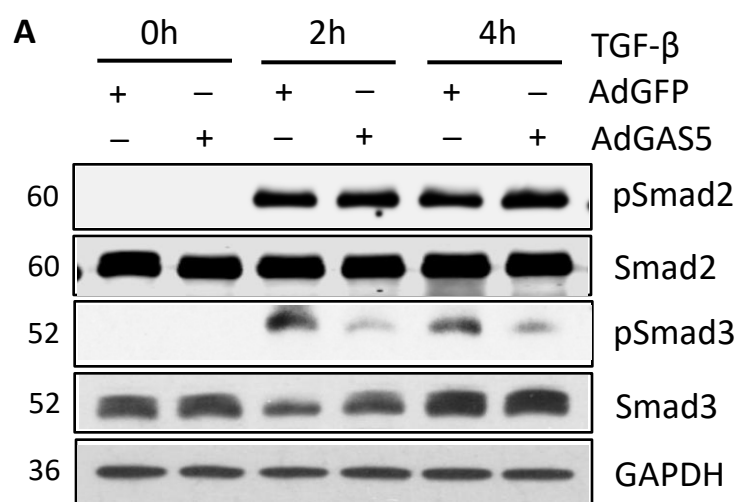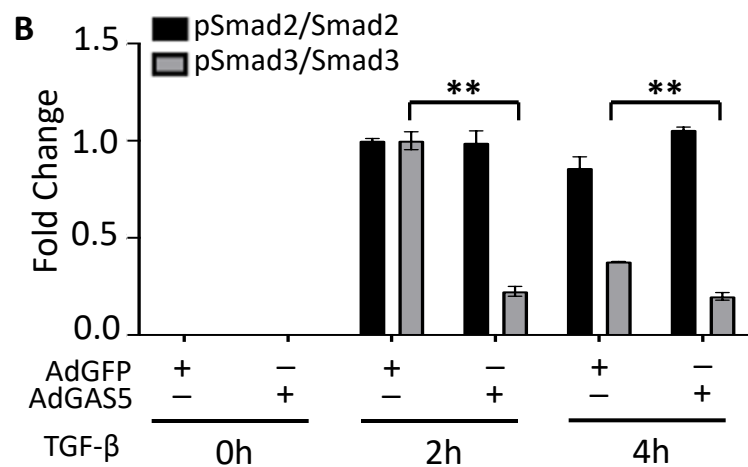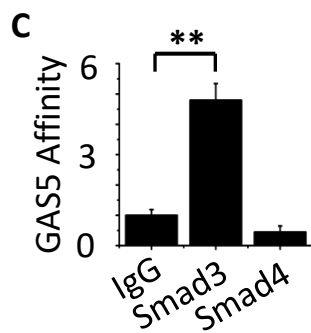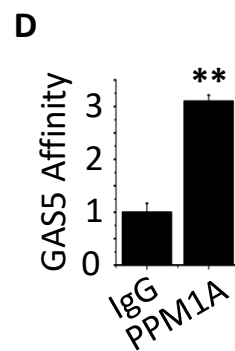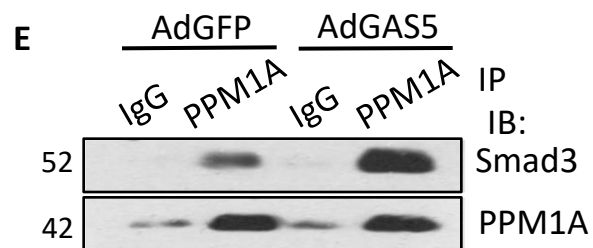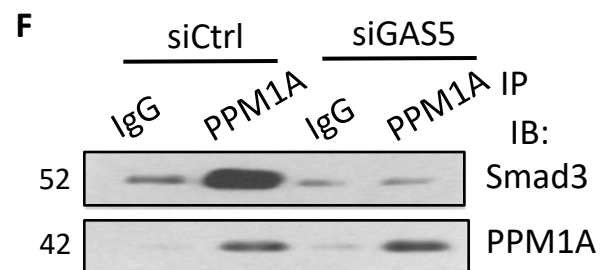

Fig 4

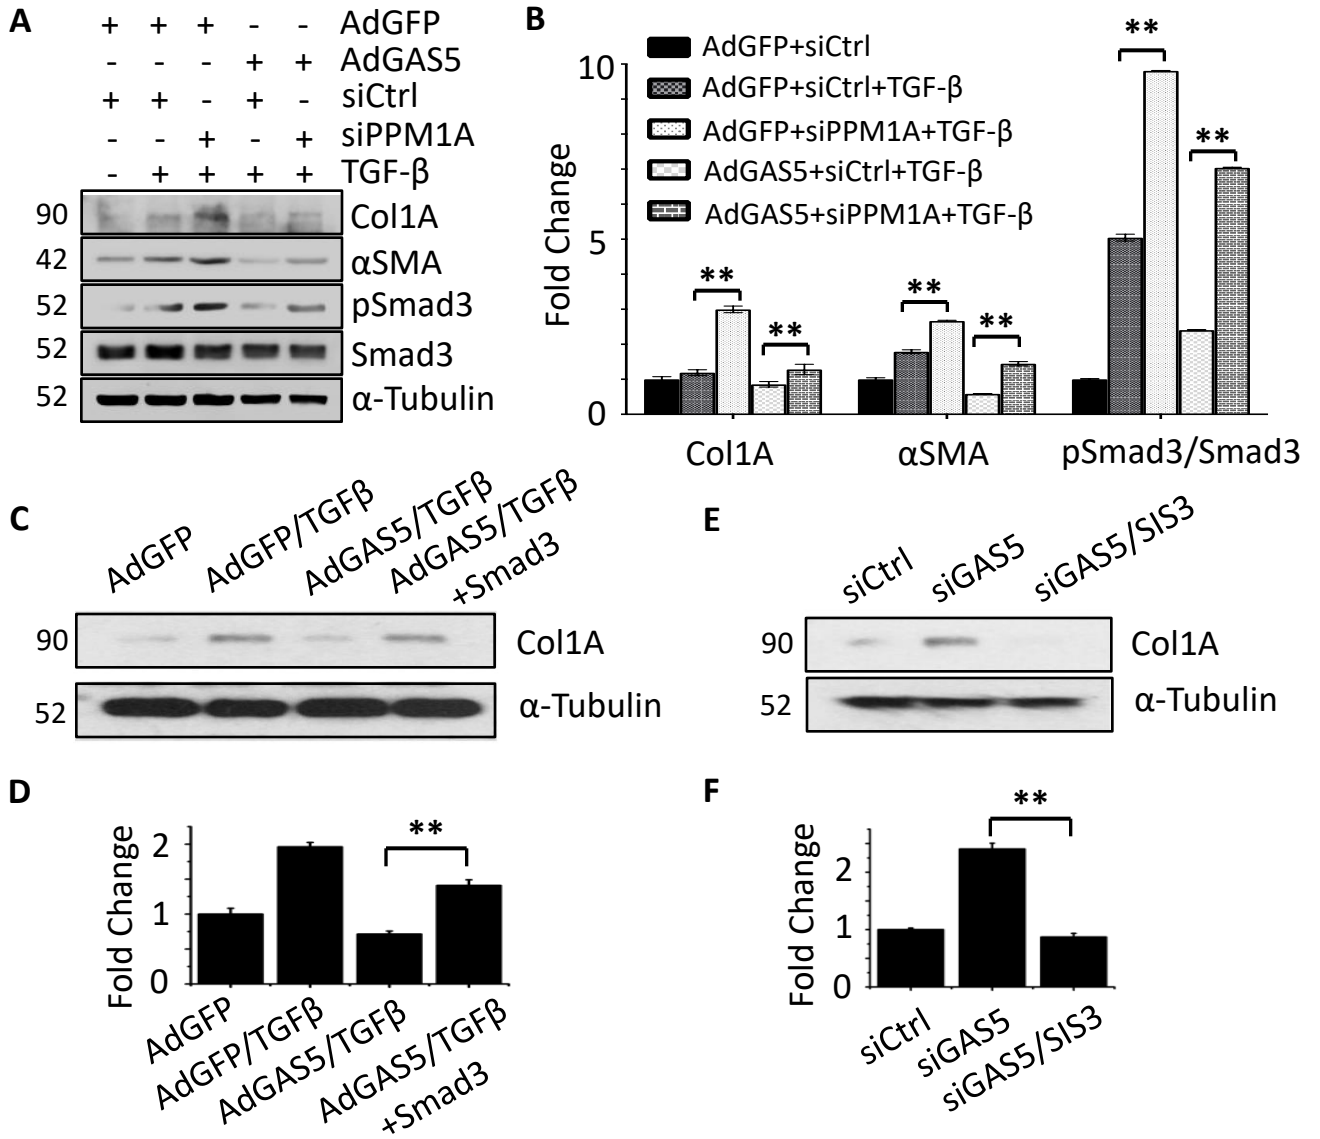

Fig 5

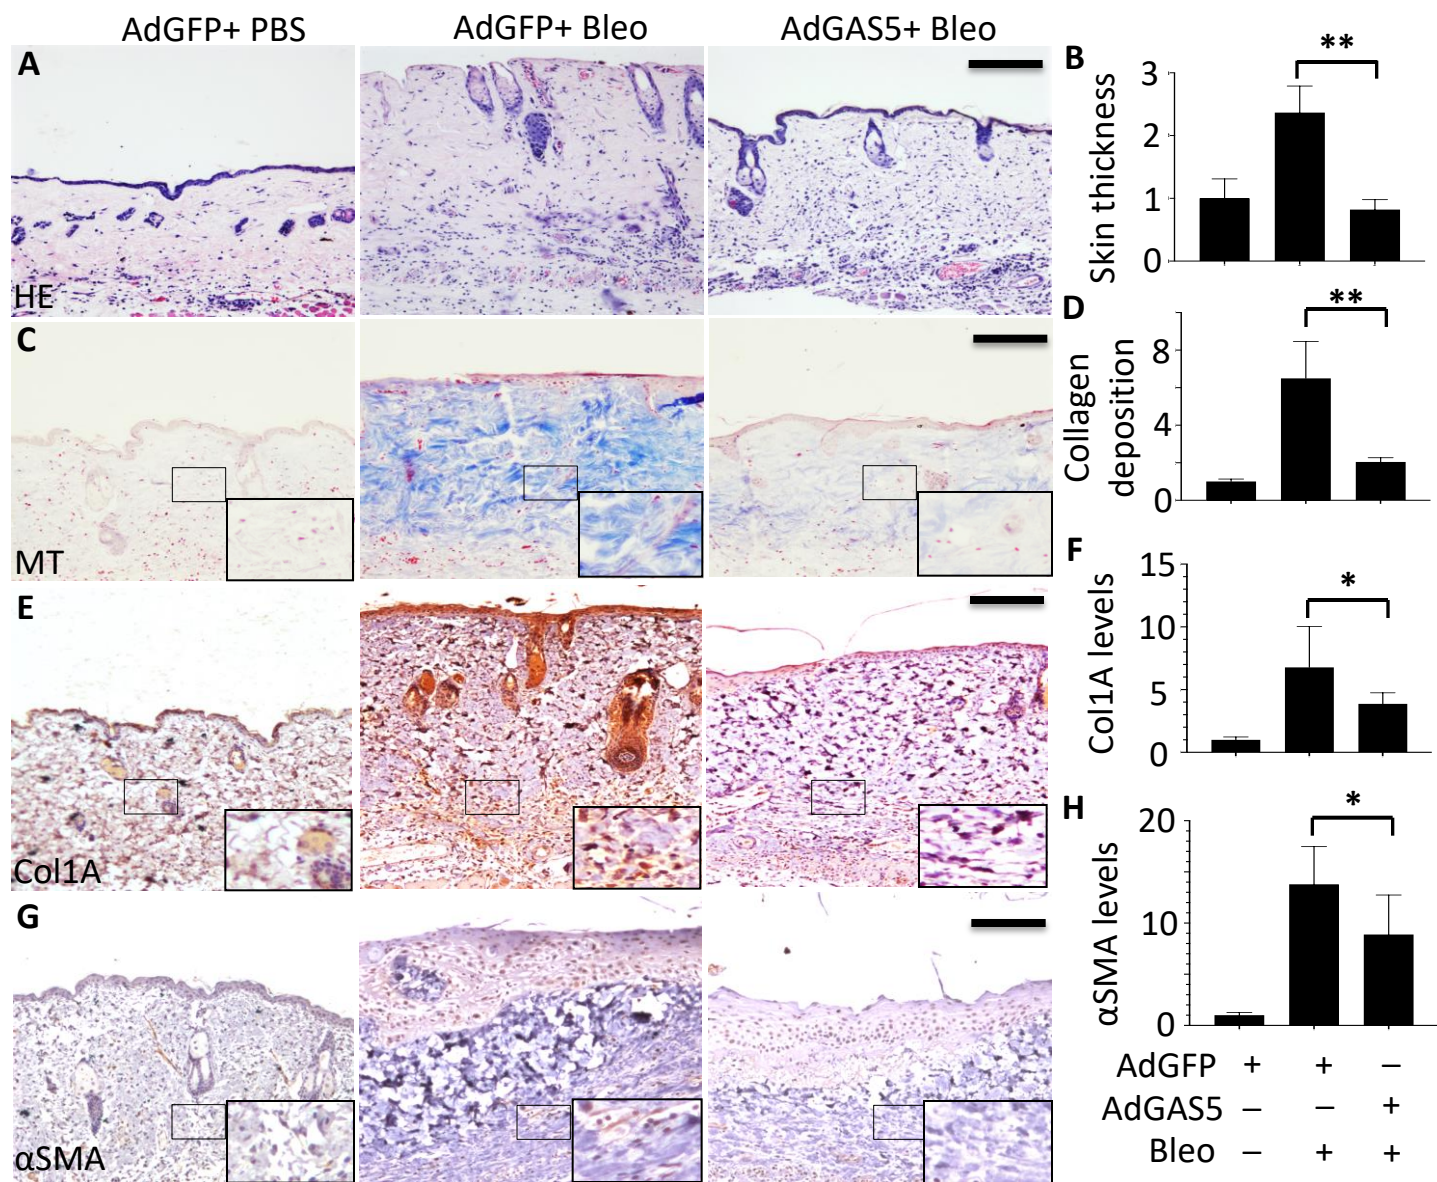

Fig 6

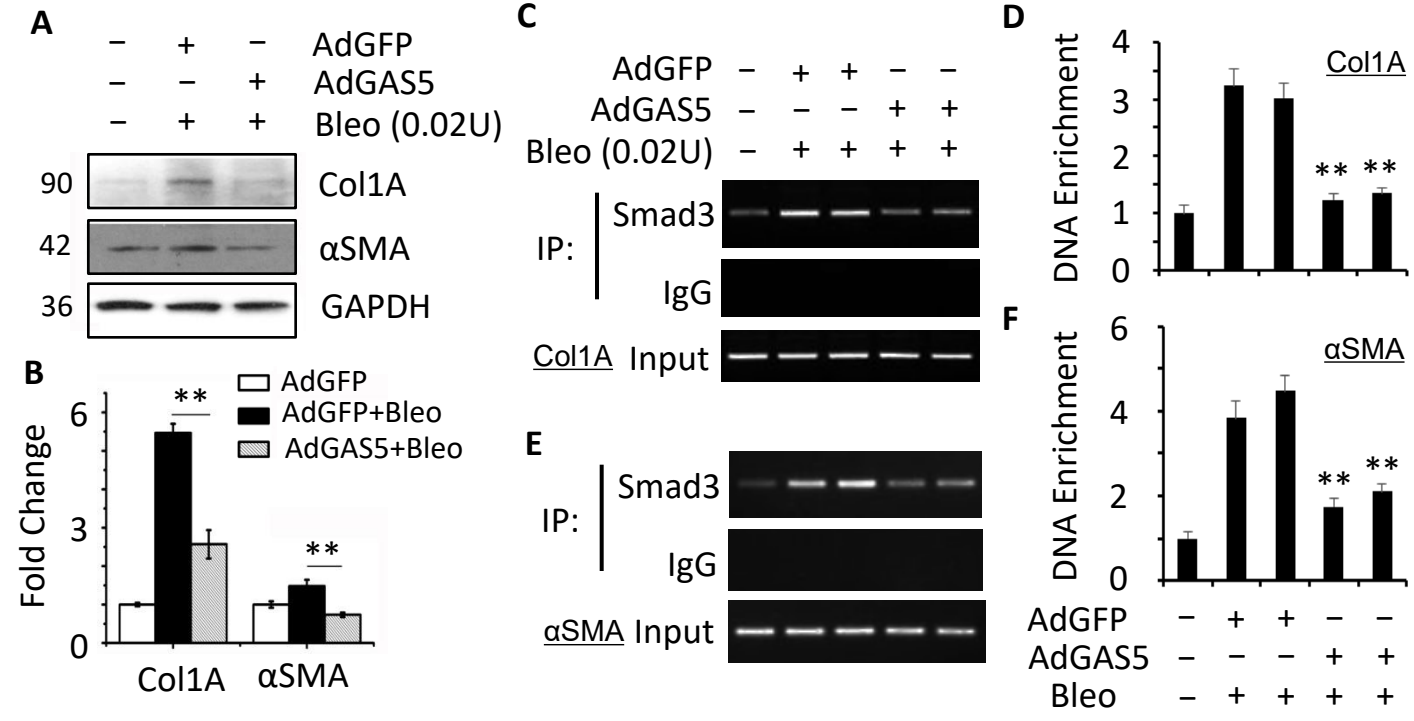

Fig 7

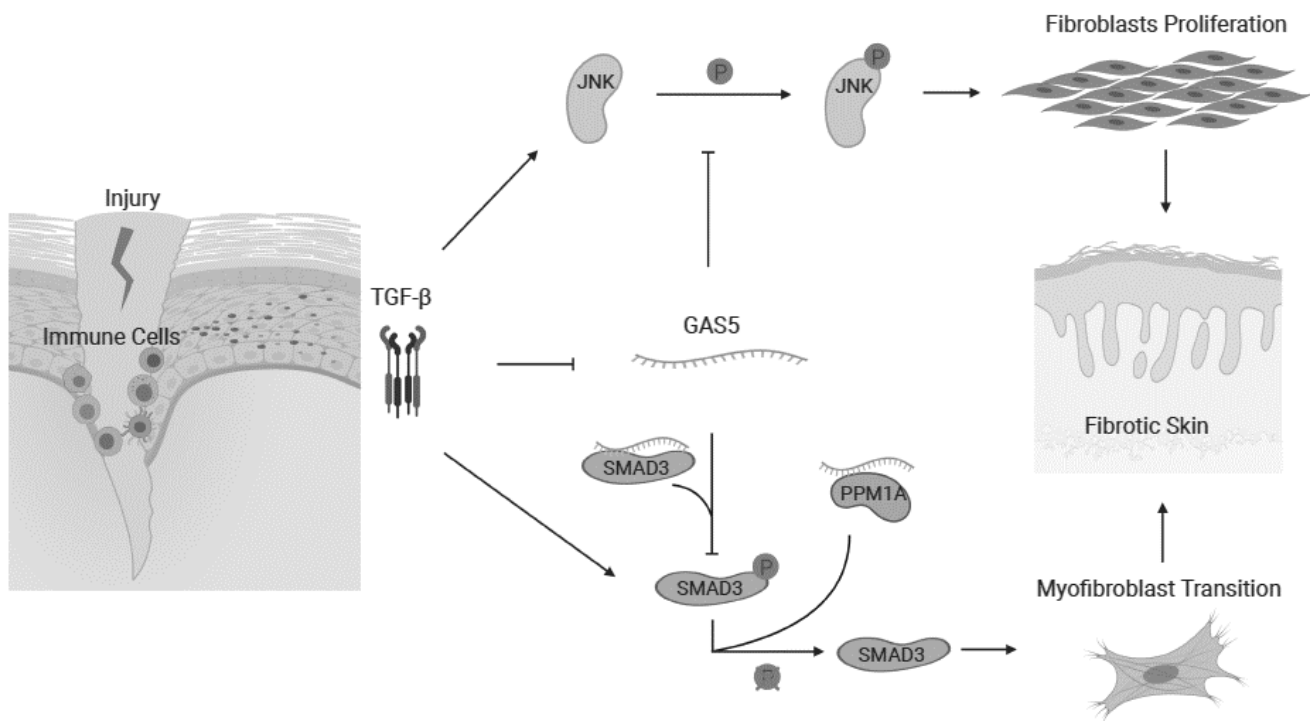

Source: http://biorxiv.org/content/10.1101/2020.02.01.930412v3.full.pdf
